# Supplementary material for: Curli Functional Amyloid Systems Are Phylogenetically Widespread and Display Large Diversity in Operon and Protein Structure
Source: PLoS One. 2012 Dec 12;7(12):e51274. doi: 10.1371/journal.pone.0051274 (PMC3521004; doi:10.1371/journal.pone.0051274)
Supplement: Table S1 — Csg Protein Homologs Identified within Refseq. Csg homologs were identified using the curated HMMs and manual examination of the surrounding gene neighborhoods. (XLSX) [file pone.0051274.s008.xlsx]

## Sheet: Sheet1
Latin name	CsgB	CsgA	CsgC	CsgD	CsgE	CsgF	CsgG	CsgH	CsgA/B #1	CsgA/B #2	CsgA/B #3	CsgA/B #4	CsgA/B #5	CsgA/B #6	CsgA/B #7	CsgE #2	CsgF #2	CsgG #2	CsgH #2
Aeromonas veronii B565	YP_004391082	YP_004391083	YP_004391084	YP_004391078	YP_004391079	YP_004391080	YP_004391081
Agrobacterium sp. H13-3								YP_004442925	YP_004442926	YP_004442924
Agrobacterium tumefaciens str. C58								NP_355898	NP_355899	NP_355897
Aliivibrio salmonicida LFI1238		YP_002264194		YP_002264190	YP_002264189	YP_002264188
Alteromonas macleodii str. 'Deep ecotype'	YP_004428406	YP_004428405		YP_004428401	YP_004428404	YP_004428403	YP_004428402
Bradyrhizobium japonicum USDA 110									NP_771938	NP_771937	NP_771940	NP_771939
Bradyrhizobium sp. S23321									YP_005450300	YP_005450301	YP_005450298	YP_005450299
Bradyrhizobium sp. WSM1253									ZP_10079509	ZP_10079510	ZP_10079507	ZP_10079508
Bradyrhizobium sp. WSM471									ZP_09649233	ZP_09649232	ZP_09649235	ZP_09649234
Burkholderia sp. 383					YP_373341	YP_373342	YP_373343	YP_373346			YP_373344	YP_373345
Chelativorans sp. BNC1								YP_673487			YP_673488	YP_673486
Citrobacter koseri ATCC BAA-895	YP_001453588	YP_001453587	YP_001453586	YP_001453591	YP_001453592	YP_001453593	YP_001453594
Citrobacter rodentium ICC168	YP_003364703	YP_003364704	YP_003364705	YP_003364702	YP_003364701	YP_003364700	YP_003364699
Citrobacter sp. 30_2	ZP_04561455	ZP_04561456	ZP_04561457	ZP_04561454	ZP_04561453	ZP_04561452	ZP_04561451
Citrobacter youngae ATCC 29220	ZP_06353405	ZP_06353404		ZP_06571117	ZP_06571118	ZP_06353408	ZP_06353409
Cronobacter turicensis z3032	YP_003209983	YP_003209984	YP_003209985	YP_003209982	YP_003209981	YP_003209980	YP_003209979
Desulfovibrio africanus str. Walvis Bay					YP_005051454	YP_005051455	YP_005051456	YP_005051457	YP_005051466	YP_005050788	YP_005050789
Enterobacter asburiae LF7a	YP_004828103	YP_004828104	YP_004828105	YP_004828102	YP_004828101	YP_004828100	YP_004828099
Enterobacter cloacae EcWSU1	YP_004951492	YP_004951493	YP_004951494	YP_004951490		YP_004951489	YP_004951488
Enterobacter cloacae subsp. cloacae ATCC 13047	YP_003613091	YP_003613090	YP_003613089	YP_003613092	YP_003613093	YP_003613094	YP_003613095
Enterobacter sp. 638	YP_001176287	YP_001176288	YP_001176289	YP_001176286	YP_001176285	YP_001176284	YP_001176283
Escherichia coli 'BL21-Gold(DE3)pLysS AG'	YP_003036765	YP_003036764	YP_003036763		YP_003036767	YP_003036768	YP_003036769
Escherichia coli 536	YP_668948	YP_668949	YP_668950	YP_668946	YP_668945	YP_668944	YP_668943
Escherichia coli 55989	YP_002402243	YP_002402244	YP_002402245	YP_002402242	YP_002402241	YP_002402240	YP_002402239
Escherichia coli ABU 83972	YP_006105350	YP_006105351	YP_006105352	YP_006105349	YP_006105348	YP_006105347	YP_006105346
Escherichia coli APEC O1	YP_852143	YP_852144	YP_852145	YP_852142	YP_852141	YP_852140	YP_852139
Escherichia coli ATCC 8739	YP_001725516	YP_001725515	YP_001725514	YP_001725517	YP_001725518	YP_001725519	YP_001725520
Escherichia coli B str. REL606	YP_003044256	YP_003044257	YP_003044258	YP_003044255	YP_003044254	YP_003044253	YP_003044252
Escherichia coli B088	ZP_06661762	ZP_06661763	ZP_06661764	ZP_06661761	ZP_06661760	ZP_06661759	ZP_06661758
Escherichia coli B185	ZP_06656988	ZP_06656989	ZP_06656990	ZP_06656987	ZP_06656986	ZP_06656985	ZP_06656984
Escherichia coli B354	ZP_06652988	ZP_06652989	ZP_06652990	ZP_06652987	ZP_06652986	ZP_06652985	ZP_06652984
Escherichia coli BW2952	YP_002926092	YP_002926093	YP_002926094	YP_002926091	YP_002926090	YP_002926089	YP_002926088
Escherichia coli CFT073	NP_753218	NP_753219	NP_753220	NP_753215	NP_753214	NP_753213	NP_753212
Escherichia coli DH1	YP_006092529	YP_006092528	YP_006092527	YP_006092530	YP_006092531	YP_006092532	YP_006092533
Escherichia coli E24377A	YP_001462273	YP_001462274	YP_001462275	YP_001462271	YP_001462270	YP_001462269	YP_001462268
Escherichia coli ED1a	YP_002397206	YP_002397207	YP_002397208	YP_002397205	YP_002397204	YP_002397203	YP_002397202
Escherichia coli FVEC1302	ZP_06989712	ZP_06989713	ZP_06989714	ZP_06989711	ZP_06989710	ZP_06989709	ZP_06989708
Escherichia coli FVEC1412	ZP_06648323	ZP_06648324	ZP_06648325	ZP_06648321	ZP_06648320	ZP_06648319	ZP_06648318
Escherichia coli H299	ZP_08383160	ZP_08383161	ZP_08383162	ZP_08383157	ZP_08383156	ZP_08383155	ZP_08383154
Escherichia coli H591	ZP_08377526	ZP_08377527	ZP_08377528	ZP_08377523	ZP_08377522	ZP_08377521	ZP_08377520
Escherichia coli H736	ZP_08342717	ZP_08342718	ZP_08342719	ZP_08342714	ZP_08342713	ZP_08342712	ZP_08342711
Escherichia coli HS	YP_001457882	YP_001457883	YP_001457884	YP_001457880	YP_001457879	YP_001457878	YP_001457877
Escherichia coli IAI1	YP_002386532	YP_002386533	YP_002386534	YP_002386531	YP_002386530	YP_002386529	YP_002386528
Escherichia coli IAI39	YP_002408085	YP_002408084	YP_002408083	YP_002408086	YP_002408087	YP_002408088	YP_002408089
Escherichia coli IHE3034	YP_006100353	YP_006100354	YP_006100355	YP_006100351	YP_006100350	YP_006100349	YP_006100348
Escherichia coli KO11FL	YP_005278451	YP_005278450	YP_005278449	YP_005278452	YP_005278453	YP_005278454	YP_005278455
Escherichia coli M605	ZP_08347399	ZP_08347400	ZP_08347401	ZP_08347396	ZP_08347395	ZP_08347394	ZP_08347393
Escherichia coli M718	ZP_08353111	ZP_08353112	ZP_08353113	ZP_08353109	ZP_08353108	ZP_08353107	ZP_08353106
Escherichia coli NA114	YP_006138194		YP_006138195	YP_006137929	YP_006137928	YP_006137927	YP_006137926
Escherichia coli O103:H2 str. 12009	YP_003221060	YP_003221061	YP_003221062	YP_003221058	YP_003221057	YP_003221056	YP_003221055
Escherichia coli O111:H- str. 11128	YP_003233807	YP_003233808	YP_003233809	YP_003233805	YP_003233804	YP_003233803	YP_003233802
Escherichia coli O127:H6 str. E2348/69	YP_002328682	YP_002328683	YP_002328684	YP_002328680	YP_002328679	YP_002328678	YP_002328677
Escherichia coli O157:H7 str. EC4115	YP_002269889	YP_002269890	YP_002269891	YP_002269887	YP_002269886	YP_002269885	YP_002269884
Escherichia coli O157:H7 str. EDL933	NP_287175	NP_287176	NP_287177	NP_287174	NP_287173	NP_287172	NP_287171
Escherichia coli O157:H7 str. Sakai	NP_309446	NP_309447	NP_309448	NP_309444	NP_309443	NP_309442	NP_309441
Escherichia coli O157:H7 str. TW14359	YP_003077262	YP_003077263	YP_003077264	YP_003077260	YP_003077259	YP_003077258	YP_003077257
Escherichia coli O26:H11 str. 11368	YP_003228416	YP_003228417	YP_003228418	YP_003228414	YP_003228413	YP_003228412	YP_003228411
Escherichia coli O55:H7 str. CB9615	YP_003498879	YP_003498880	YP_003498881	YP_003498877	YP_003498876	YP_003498875	YP_003498874
Escherichia coli O7:K1 str. CE10	YP_006143222	YP_006143223	YP_006143224	YP_006143219	YP_006143218	YP_006143217	YP_006143216
Escherichia coli S88	YP_002390835	YP_002390836	YP_002390837	YP_002390834	YP_002390833	YP_002390832	YP_002390831
Escherichia coli SE11	YP_002292379	YP_002292380	YP_002292381	YP_002292377	YP_002292376	YP_002292375	YP_002292374
Escherichia coli SMS-3-5	YP_001744142	YP_001744141	YP_001744140	YP_001744145	YP_001744146	YP_001744147	YP_001744148
Escherichia coli str. 'clone D i14'	YP_006153315	YP_006153316	YP_006153317	YP_006153312	YP_006153311	YP_006153310	YP_006153309
Escherichia coli str. 'clone D i2'	YP_006148396	YP_006148397	YP_006148398	YP_006148393	YP_006148392	YP_006148391	YP_006148390
Escherichia coli str. K-12 substr. DH10B	YP_001730013	YP_001730014	YP_001730015	YP_001730012	YP_001730011	YP_001730010	YP_001730009
Escherichia coli str. K-12 substr. MG1655	NP_415559	NP_415560	NP_415561	NP_415558	NP_415557	NP_415556	NP_415555
Escherichia coli TA143	ZP_08363366	ZP_08363367	ZP_08363368	ZP_08363363	ZP_08363362		ZP_08363361
Escherichia coli TA206	ZP_08358059	ZP_08358060	ZP_08358061	ZP_08358056	ZP_08358055	ZP_08358054	ZP_08358053
Escherichia coli TA271	ZP_08368301	ZP_08368302	ZP_08368303	ZP_08368298	ZP_08368297	ZP_08368296	ZP_08368295
Escherichia coli TA280	ZP_08373351	ZP_08373352	ZP_08373353	ZP_08373349	ZP_08373348	ZP_08373347
Escherichia coli UM146	YP_006111305	YP_006111304	YP_006111303	YP_006111306	YP_006111307	YP_006111308	YP_006111309
Escherichia coli UMN026	YP_002411968	YP_002411969	YP_002411970	YP_002411967	YP_002411966	YP_002411965	YP_002411964
Escherichia coli UMNK88	YP_006133081	YP_006133082	YP_006133083	YP_006133078	YP_006133077	YP_006133076	YP_006133075
Escherichia coli UTI89	YP_540177	YP_540178	YP_540179	YP_540174	YP_540173	YP_540172	YP_540171
Escherichia coli W	YP_006123889	YP_006123890	YP_006123891	YP_006123888	YP_006123887	YP_006123886	YP_006123885
Escherichia fergusonii ATCC 35469	YP_002383020	YP_002383019	YP_002383018	YP_002383021	YP_002383022	YP_002383023	YP_002383024
Escherichia sp. 3_2_53FAA	ZP_04537457	ZP_04537456	ZP_04537455		ZP_04537461	ZP_04537462	ZP_04537463
Flavobacteriaceae bacterium 3519-10			YP_003095823		YP_003095823	YP_003095822	YP_003095821		YP_003095824
Flavobacterium johnsoniae UW101					YP_001194695	YP_001194696	YP_001194697		YP_001194692	YP_001194693
Gillisia limnaea DSM 15749					ZP_09669940	ZP_09669941	ZP_09669942		ZP_09669938	ZP_09669939
Halanaerobium hydrogeniformans						YP_003995577	YP_003995576		YP_003995580	YP_003995579								YP_003995575
Halomonas boliviensis LC1	ZP_09187623	ZP_09187624		ZP_09187619	ZP_09187620	ZP_09187621	ZP_09187622
Haloterrigena turkmenica DSM 5511									YP_003402832.1
Hyphomicrobium sp. MC1						YP_004678245	YP_004678246	YP_004678243	YP_004678243	YP_004678242
Idiomarina loihiensis L2TR	YP_154552	YP_154551		YP_154547	YP_154550	YP_154549	YP_154548
Krokinobacter sp. 4H-3-7-5					YP_004429402	YP_004429401	YP_00442940		YP_004429404	YP_004429403								YP_004429400
Lacinutrix sp. 5H-3-7-4					YP_004578570	YP_004578569	YP_004578568		YP_004578573	YP_004578572	YP_004578571
Methylobacterium populi BJ001						YP_001922762	YP_001922761	YP_001922764	YP_001922759	YP_001922765	YP_001922763
Methylobacterium sp. 4-46						YP_001769304	YP_001769309		YP_001769306	YP_001769305
Pelagibacterium halotolerans B2								YP_004898431	YP_004898434	YP_004898430
Pseudoalteromonas haloplanktis TAC125		YP_341688		YP_341684	YP_341687	YP_341686	YP_341685
Pseudoalteromonas sp. SM9913		YP_004065197		YP_004065193	YP_004065196	YP_004065195	YP_004065194											YP_004067336
Pseudomonas entomophila L48	YP_608396	YP_608397			YP_608412	YP_608411	YP_608410
Pseudomonas fluorescens Pf0-1	YP_347729	YP_347728			YP_347723	YP_347724	YP_347725
Pseudomonas putida BIRD-1	YP_005930227	YP_005930226			YP_005930157	YP_005930158	YP_005930159
Pseudomonas putida F1	YP_001267688	YP_001267687			YP_001267620	YP_001267621	YP_001267622
Pseudomonas putida GB-1	YP_001668786	YP_001668785			YP_001668698	YP_001668699	YP_001668700
Pseudomonas putida KT2440	NP_745538				NP_745611	NP_745610	NP_745609
Pseudomonas putida S16	YP_004702297	YP_004702298			YP_004702379	YP_004702378	YP_004702377
Pseudomonas putida W619	YP_001749815	YP_001749816			YP_001749341	YP_001749342	YP_001749343
Pseudomonas stutzeri A1501	YP_001173348	YP_001173349		YP_001173344	YP_001173345	YP_001173346	YP_001173347		YP_001170940	YP_001170941	YP_001172633
Pseudomonas stutzeri ATCC 17588 = LMG 11199	YP_004715255	YP_004715256		YP_004715251	YP_004715252	YP_004715253	YP_004715254		YP_004712792	YP_004712793	YP_004714384
Pseudomonas stutzeri DSM 4166	YP_005939616	YP_005939617		YP_005939611	YP_005939612	YP_005939613	YP_005939614		YP_005937106	YP_005937107	YP_005938786
Pseudovibrio sp. FO-BEG1	YP_005082868	YP_005082867				YP_005082870	YP_005082869		YP_005082866
Pseudovibrio sp. JE062	ZP_05083941	ZP_05083720				ZP_05083605	ZP_05083600		ZP_05083852
Pusillimonas sp. T7-7			YP_004416404		YP_004416400	YP_004416401	YP_004416402		YP_004416403
Rahnella aquatilis CIP 78.65 = ATCC 33071	YP_005199244	YP_005199245	YP_005199246	YP_005199243	YP_005199242	YP_005199241	YP_005199240
Rahnella aquatilis HX2	YP_005400920	YP_005400921	YP_005400922	YP_005400919	YP_005400918	YP_005400917	YP_005400916
Rahnella sp. Y9602	YP_004211894	YP_004211895	YP_004211896	YP_004211893	YP_004211892	YP_004211891	YP_004211890
Rhizobium etli CFN 42								YP_472327	YP_472326	YP_472328
Rhodomicrobium vannielii ATCC 17100						YP_004012391	YP_004012392	YP_004012397	YP_004012395	YP_004012393	YP_004012394
Rhodopseudomonas palustris BisB5						YP_569861	YP_569862	YP_569859	YP_569860	YP_569865	YP_569857	YP_569858
Rhodopseudomonas palustris CGA009						NP_946436	NP_946437	NP_946434	NP_946433	NP_946435	NP_948668	NP_948674	NP_946433	NP_946435			NP_948671	NP_948672	NP_948669
Rhodopseudomonas palustris DX-1						YP_004107610	YP_004107611	YP_004107608	YP_004108391	YP_004108392	YP_004108395	YP_004108396	YP_004108397	YP_004107607	YP_004107609		YP_004108394	YP_004108393	YP_004108396
Rhodopseudomonas palustris TIE-1						YP_001990290	YP_001990291	YP_001990288	YP_001992730	YP_001990287	YP_001990289						YP_001992727	YP_001992728	YP_001992725
Salinibacter ruber M8					YP_003644934	YP_003644935	YP_003644936	YP_003644939	YP_003644937	YP_003644938
Salmonella bongori NCTC 12419	YP_004729864	YP_004729865	YP_004729866	YP_004729863	YP_004729862	YP_004729861	YP_004729860
Salmonella enterica subsp. arizonae serovar 62:z4,z23:-- str. RSK2980	YP_001570882	YP_001570881	YP_001570880	YP_001570883		YP_001570884
Salmonella enterica subsp. enterica serovar Agona str. SL483	YP_002146902	YP_002146901	YP_002146900	YP_002146903	YP_002146904	YP_002146905	YP_002146906
Salmonella enterica subsp. enterica serovar Choleraesuis str. SC-B67	YP_216078	YP_216079	YP_216080	YP_216077	YP_216076	YP_216075	YP_216074
Salmonella enterica subsp. enterica serovar Choleraesuis str. SCSA50	ZP_09759155	ZP_09759156	ZP_09759157	ZP_09759154	ZP_09759153	ZP_09759152	ZP_09759151
Salmonella enterica subsp. enterica serovar Dublin str. CT_02021853	YP_002215995	YP_002215994	YP_002215993	YP_002215996	YP_002215997	YP_002215998	YP_002215999
Salmonella enterica subsp. enterica serovar Dublin str. SD3246	ZP_09764644	ZP_09764643	ZP_09764642	ZP_09764645	ZP_09764646	ZP_09764647	ZP_09764648
Salmonella enterica subsp. enterica serovar Enteritidis str. P125109	YP_002244000	YP_002243999	YP_002243998	YP_002244001	YP_002244002	YP_002244003	YP_002244004
Salmonella enterica subsp. enterica serovar Gallinarum str. 287/91	YP_002226919	YP_002226918	YP_002226917	YP_002226920	YP_002226921	YP_002226922	YP_002226923
Salmonella enterica subsp. enterica serovar Gallinarum str. SG9	ZP_09769112	ZP_09769111	ZP_09769110	ZP_09769113	ZP_09769114	ZP_09769115	ZP_09769116
Salmonella enterica subsp. enterica serovar Gallinarum/pullorum str. RKS5078	YP_005212170	YP_005212171	YP_005212172	YP_005212169	YP_005212168	YP_005212167	YP_005212166
Salmonella enterica subsp. enterica serovar Heidelberg str. B182	YP_006087407	YP_006087408	YP_006087409	YP_006087406	YP_006087405	YP_006087404	YP_006087403
Salmonella enterica subsp. enterica serovar Heidelberg str. SL476	YP_002045141	YP_002045142	YP_002045143	YP_002045140	YP_002045139	YP_002045138	YP_002045137
Salmonella enterica subsp. enterica serovar Newport str. SL254	YP_002040396	YP_002040397	YP_002040398	YP_002040395	YP_002040394	YP_002040393	YP_002040392
Salmonella enterica subsp. enterica serovar Paratyphi A str. AKU_12601	YP_002142429	YP_002142428	YP_002142427	YP_002142430	YP_002142431		YP_002142432
Salmonella enterica subsp. enterica serovar Paratyphi A str. ATCC 9150	YP_150944	YP_150943	YP_150942	YP_150945	YP_150946		YP_150947
Salmonella enterica subsp. enterica serovar Paratyphi B str. SPB7	YP_001588604	YP_001588603	YP_002633100	YP_001588609	YP_001588610	YP_001588611	YP_001588612
Salmonella enterica subsp. enterica serovar Paratyphi C strain RKS4594	YP_002638150	YP_002638149	YP_002638148	YP_002638151	YP_002638152	YP_002638153	YP_002638154
Salmonella enterica subsp. enterica serovar Schwarzengrund str. CVM19633	YP_002114140	YP_002114141	YP_002114142	YP_002114139	YP_002114138	YP_002114137	YP_002114136
Salmonella enterica subsp. enterica serovar Typhi str. CT18	NP_455637	NP_455638	NP_455639	NP_455636	NP_455635	NP_455634	NP_455633
Salmonella enterica subsp. enterica serovar Typhi str. P-stx-12	YP_005217430	YP_005217429	YP_005217428	YP_005217431	YP_005217432	YP_005217433	YP_005217434
Salmonella enterica subsp. enterica serovar Typhi str. Ty2	NP_805551	NP_805550	NP_805549	NP_805552	NP_805553	NP_805554	NP_805555
Salmonella enterica subsp. enterica serovar Typhimurium str. 14028S	YP_005236893	YP_005236894	YP_005236895	YP_005236890	YP_005236889	YP_005236888	YP_005236887
Salmonella enterica subsp. enterica serovar Typhimurium str. 798	YP_005396555	YP_005396556	YP_005396557	YP_005396554	YP_005396553	YP_005396552	YP_005396551
Salmonella enterica subsp. enterica serovar Typhimurium str. D23580	YP_005232208	YP_005232209	YP_005232210	YP_005232207	YP_005232206	YP_005232205	YP_005232204
Salmonella enterica subsp. enterica serovar Typhimurium str. LT2	NP_460114	NP_460115	NP_460116	NP_460113	NP_460112	NP_460111	NP_460110
Salmonella enterica subsp. enterica serovar Typhimurium str. SL1344	YP_005180993	YP_005180994	YP_005180995	YP_005180992	YP_005180991	YP_005180990	YP_005180989
Salmonella enterica subsp. enterica serovar Typhimurium str. ST4/74	YP_005242041	YP_005242042	YP_005242043	YP_005242040	YP_005242039	YP_005242038	YP_005242037
Salmonella enterica subsp. enterica serovar Typhimurium str. T000240	YP_005246857	YP_005246858	YP_005246859	YP_005246856	YP_005246855	YP_005246854	YP_005246853
Salmonella enterica subsp. enterica serovar Typhimurium str. UK-1	YP_005251651	YP_005251652	YP_005251653	YP_005251650	YP_005251649	YP_005251648	YP_005251647
Shewanella amazonensis SB2B	YP_928818	YP_928819		YP_928820	YP_928731	YP_928730	YP_928729
Shewanella baltica BA175	YP_006019454	YP_006019453		YP_006019452	YP_006019613	YP_006019614	YP_006019615
Shewanella baltica OS117	YP_006038809	YP_006038810		YP_006038811	YP_006038646	YP_006038645	YP_006038644
Shewanella baltica OS155	YP_001051844	YP_001051845		YP_001051846	YP_001051683	YP_001051682	YP_001051681
Shewanella baltica OS183	ZP_09610791	ZP_09610792		ZP_09610793	ZP_09610628	ZP_09610627	ZP_09610626
Shewanella baltica OS185	YP_001365059	YP_001365058		YP_001365057	YP_001365218	YP_001365219	YP_001365220
Shewanella baltica OS195	YP_001553314	YP_001553313		YP_001553312	YP_001553472	YP_001553473	YP_001553474
Shewanella baltica OS223	YP_002356806	YP_002356805		YP_002356804	YP_002356962	YP_002356963	YP_002356964
Shewanella baltica OS678	YP_005272132	YP_005272131		YP_005272130	YP_005272293	YP_005272294	YP_005272295
Shewanella denitrificans OS217	YP_564094	YP_564095		YP_564096	YP_561980	YP_561981	YP_561982
Shewanella frigidimarina NCIMB 400	YP_750204	YP_750205		YP_750206	YP_750207	YP_750208	YP_750209		YP_750202	YP_750203
Shewanella loihica PV-4	YP_001093851	YP_001092507		YP_001093852	YP_001093853	YP_001093854	YP_001093855
Shewanella oneidensis MR-1	NP_716497	NP_716496		NP_716495	NP_719228	NP_719227	NP_719226
Shewanella pealeana ATCC 700345	YP_001503086	YP_001501674		YP_001501675	YP_001501676	YP_001501677	YP_001501678
Shewanella putrefaciens 200	YP_006011106	YP_006011107		YP_006011108	YP_006010956	YP_006010955	YP_006010954
Shewanella putrefaciens CN-32	YP_001184646	YP_001184647		YP_001184648	YP_001184500	YP_001184499	YP_001184498
Shewanella sp. ANA-3	YP_871041	YP_871042		YP_871043	YP_870885	YP_870884	YP_870883
Shewanella sp. MR-4	YP_732859	YP_732858		YP_732857	YP_733005	YP_733006	YP_733007
Shewanella sp. MR-7	YP_739339	YP_739340		YP_739341	YP_739195	YP_739194	YP_739193
Shewanella sp. W3-18-1	YP_962211	YP_962212			YP_962365	YP_962366	YP_962367		YP_962213
Shewanella violacea DSS12	YP_003558470	YP_003558471			YP_003558474	YP_003558473	YP_003558472		YP_003557442	YP_003557443	YP_003557444					YP_003557440	YP_003557439	YP_003557438
Shewanella woodyi ATCC 51908	YP_001759037	YP_001759036		YP_001759035	YP_001759032	YP_001759033	YP_001759034
Shigella boydii CDC 3083-94						YP_001880789
Shigella boydii Sb227		YP_408440		YP_408441
Shigella dysenteriae Sd197					YP_402654	YP_402655	YP_402656
Shigella flexneri 2002017	YP_005726727			YP_005726726	YP_005726725	YP_005726724
Shigella flexneri 2a str. 2457T	NP_836736		NP_836739	NP_836735	NP_836734	NP_836733
Shigella flexneri 2a str. 301	NP_706951		NP_706954	NP_706950	NP_706949
Shigella flexneri 5 str. 8401	YP_688570			YP_688569	YP_688568	YP_688567
Shigella sonnei 53G	YP_005455694	YP_005455695	YP_005455698	YP_005455691	YP_005455690	YP_005455689	YP_005455688
Shigella sonnei Ss046	YP_310013	YP_310014	YP_310017		YP_310010	YP_310009	YP_310008
Shigella sp. D9			ZP_08392183	ZP_08392187	ZP_08392189	ZP_08392190	ZP_08392191		ZP_08392185	ZP_08392184
Spirosoma linguale DSM 74					YP_003390824	YP_003390823	YP_003390822		YP_003390825	YP_003388172	YP_003389454	YP_003389503	YP_003389504	YP_003390827	YP_003390826	YP_003389505	YP_003389506	YP_003389507
Thermodesulfobacterium sp. OPB45	YP_004627934	YP_004627935		YP_004627933	YP_004627937	YP_004627938	YP_004627939											YP_004627744
Vibrio fischeri ES114	YP_205792	YP_205793		YP_205791	YP_205790	YP_205789	YP_205788
Vibrio fischeri MJ11	YP_002157201	YP_002157202		YP_002157200	YP_002157199	YP_002157198	YP_002157197
Vibrio furnissii NCTC 11218	YP_005049763	YP_005049764			YP_005049762	YP_005049761	YP_005049760
Jannaschia sp. CCS1								YP_507949	YP_507948	YP_507950
Maricaulis maris MCS10								YP_757401	YP_757402
Rhodobacter sphaeroides ATCC 17025								YP_001169775	YP_001169774	YP_001169773	YP_001169775
Sinorhizobium fredii HH103								YP_005189189	YP_002826455	YP_005189190
Sinorhizobium fredii NGR234								YP_002826454	YP_002826455
Pelagibacterium halotolerans B2								YP_004898431	YP_004898430
